# Supplementary material for: Comparative Plastomes of Curcuma alismatifolia (Zingiberaceae) Reveal Diversified Patterns among 56 Different Cut-Flower Cultivars
Source: MDPI journal article supplement (doi:10.3390/genes14091743), 2023-08-31
Supplement: s1 [file s1]

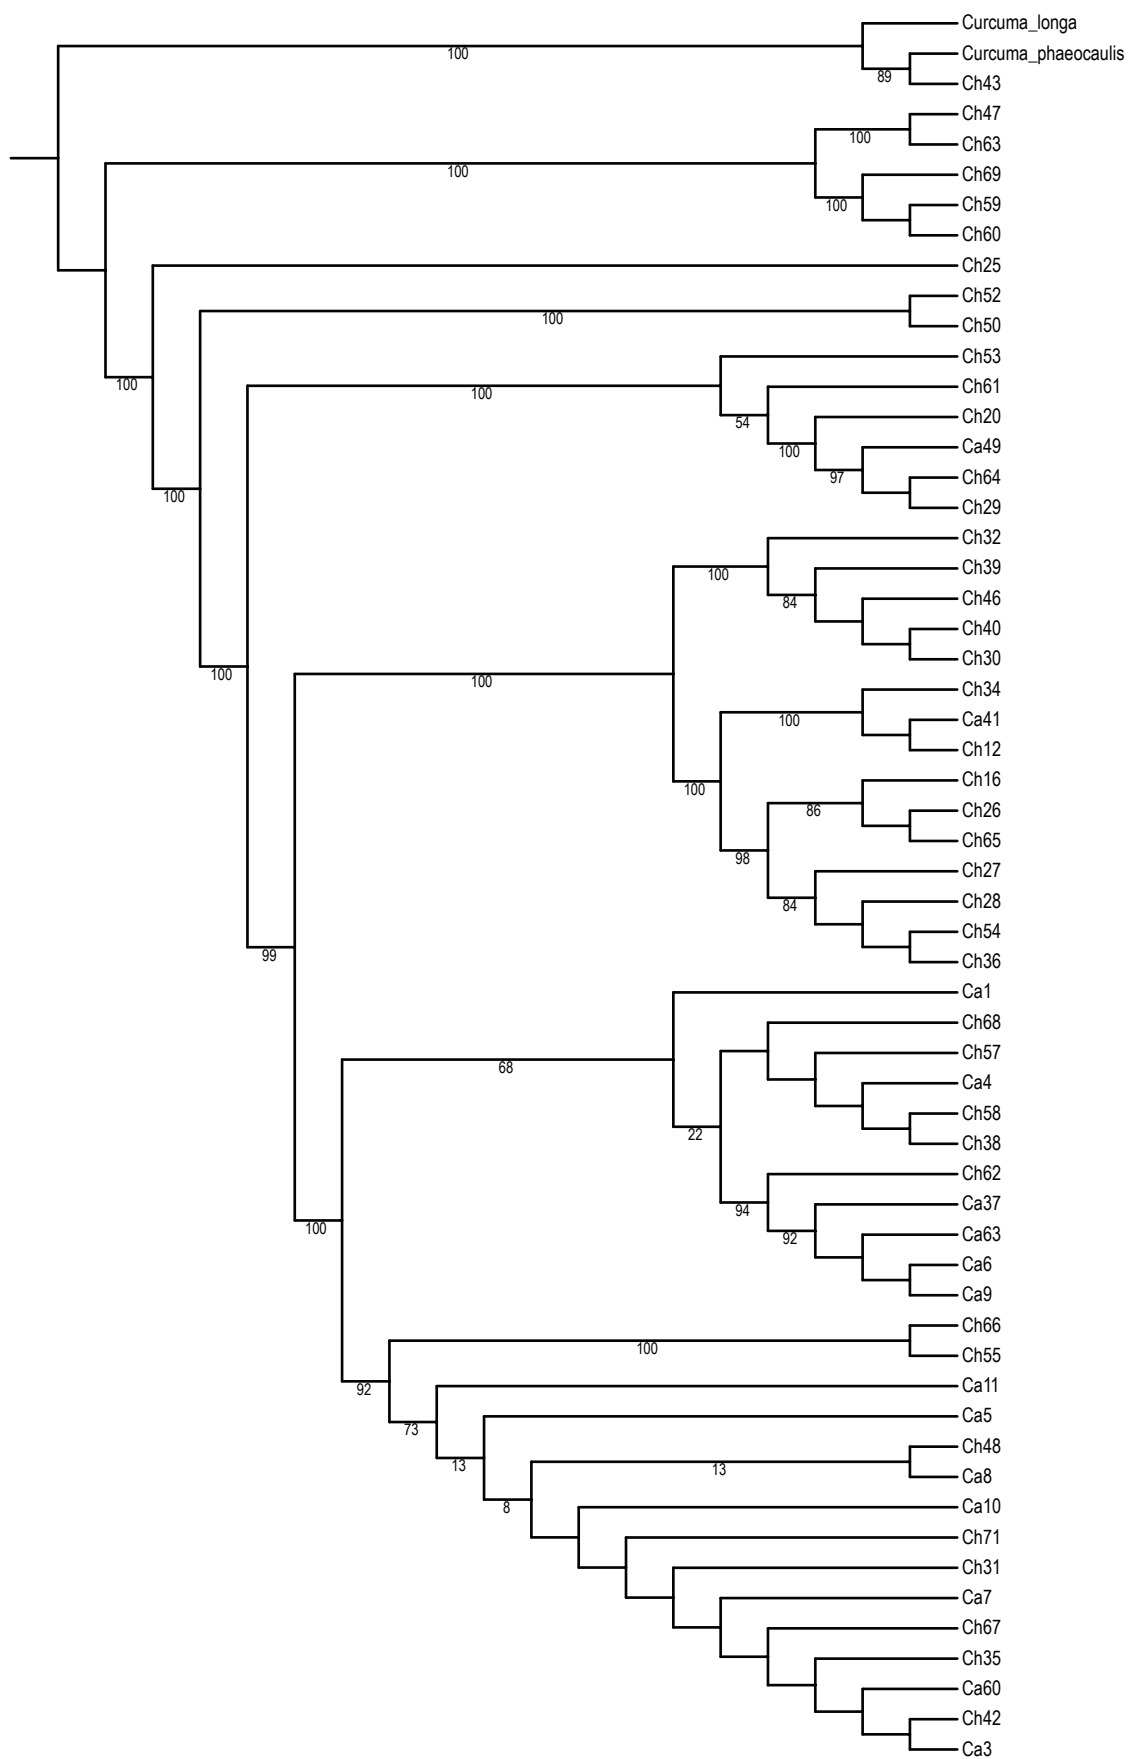

Figure S1. Phylogenetic tree of *C. alismatifolia* constructed on the CDS of 79 genes that code for proteins. Numbers at nodes indicate the ultrafast bootstrap values generated by IQ-TREE.
